# Supplementary material for: Nucleotide passivated cadmium sulfide quantum dots
Source: Royal Society of Chemistry journal article supplement (doi:10.1039/b506618b), 2005-01-01

**Supplementary information – FTIR on nucleotides and nucleotide passivated nanoparticles**

**Free ligand in black, CdS/nucleotide in grey.**

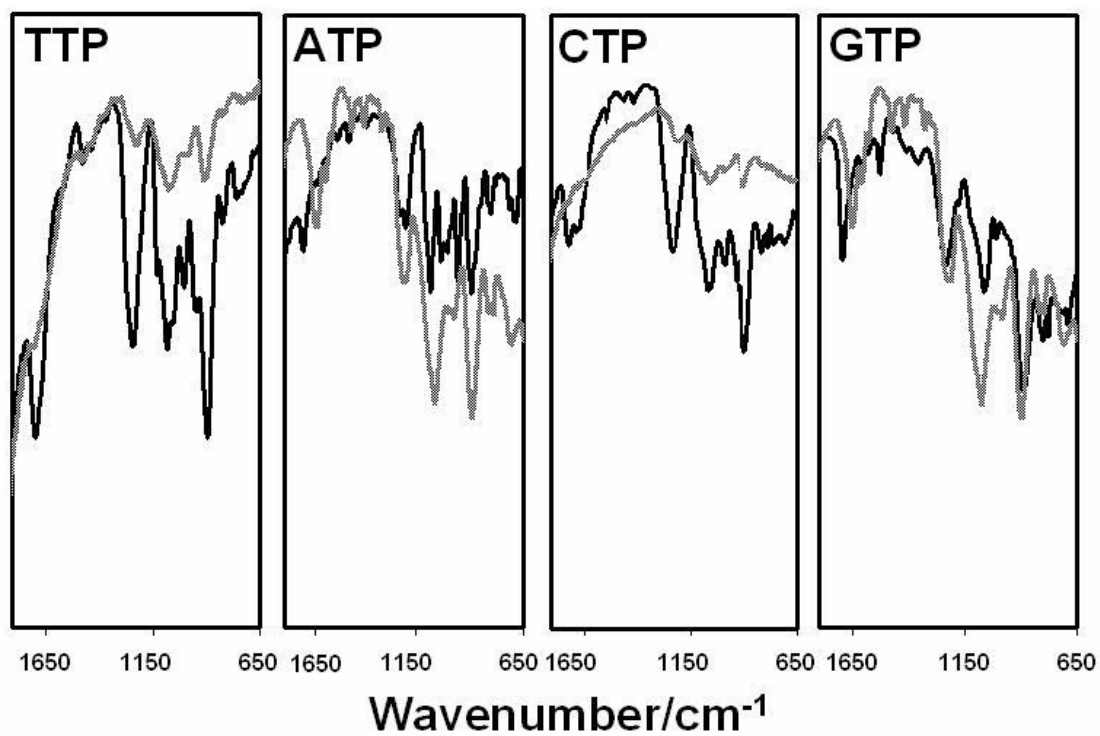

Supplement: b506618b.pdf [file b506618b.pdf]
